# Supplementary material
Source: ML conference proceedings conference paper supplement (https://proceedings.neurips.cc/paper_files/paper/2018/hash/4ad13f04ef4373992c9d3046200aa350-Abstract.html)
Supplement: Supplementary file [file 4ad13f04ef4373992c9d3046200aa350-Supplemental.zip]

## A Proofs from Section 3

**Lemma 5.** For any  $\tau, \beta, n$ , and any sequence of querying rules (with arbitrary adaptivity) interacting with  $\text{VALIDATIONROUND}(\tau, \beta, n, S, T)$

$$\mathbb{P} \left[ \forall_{i < \eta} \left| \mathcal{E}_T [Q_i] - \mathbb{E}_{x \sim \mathcal{D}} [Q_i(x)] \right| \leq \frac{\tau}{4} \right] \geq 1 - \frac{\beta}{2}.$$

*Proof.* Consider any sequence of querying rules (with arbitrary adaptivity). The interaction between the query rules and  $\text{VALIDATIONROUND}(\tau, \beta, n, S, T)$  together determines a joint distribution over statistical queries, answers, and prices  $(Q_1, A_1, P_1), \dots, (Q_{\eta-1}, A_{\eta-1}, P_{\eta-1})$ .

Consider also the interaction of the same sequence of querying rules with an alternative algorithm, which always returns  $\mathcal{E}_S [q_i] + \xi_i$  (i.e. it ignores the if-statement in  $\text{VALIDATIONROUND}$ ). This generates an infinite sequence of queries, answers, and prices  $(Q'_1, A'_1, P'_1), (Q'_2, A'_2, P'_2), \dots$ . Now, we retroactively check the condition in the if-statement for each of the queries to calculate what  $\eta$  should be, and take the length  $\eta - 1$  prefix of the  $(Q'_i, A'_i, P'_i)$ . This sequence has exactly the same distribution as the sequence generated by  $\text{VALIDATIONROUND}$ , and each  $Q'_i$  was chosen independently of  $T$  by construction. Since  $Q'_i \sim Q_i$  has outputs bounded in  $[0, 1]$ , we can apply Hoeffding's inequality:

$$\mathbb{P} \left[ \left| \mathcal{E}_T [Q_i] - \mathbb{E}_{x \sim \mathcal{D}} [Q_i(x)] \right| > \frac{\tau}{4} \right] \leq 2 \exp \left( -\frac{n\tau^2}{8} \right).$$

At most  $I(\tau, \beta, n) = \frac{\beta}{4} \exp \left( \frac{n\tau^2}{8} \right)$  queries are answered by the mechanism, so a union bound completes the proof.  $\square$

**Lemma 1.** For any  $\tau, \beta$ , and  $n$ , for any sequence of querying rules (with arbitrary adaptivity) and any probability distribution  $\mathcal{D}$ , the answers provided by  $\text{VALIDATIONROUND}(\tau, \beta, n, S, T)$  satisfy

$$\mathbb{P} \left[ \forall_{i < \eta} \left| A_i - \mathbb{E}_{x \sim \mathcal{D}} [Q_i(x)] \right| \leq \tau \right] \geq 1 - \frac{\beta}{2},$$

where the probability is taken over the randomness in the draw of datasets  $S$  and  $T$  from  $\mathcal{D}^n$ , the querying rules, and  $\text{VALIDATIONROUND}$ .

*Proof.* A query is not answered unless  $|\mathcal{E}_S [q_i] - \mathcal{E}_T [q_i]| \leq \frac{\tau}{2}$ , so  $\forall i < \eta$

$$|a_i - \mathbb{E} [q_i]| \leq |\xi_i| + |\mathcal{E}_S [q_i] - \mathcal{E}_T [q_i]| + |\mathcal{E}_T [q_i] - \mathbb{E} [q_i]| \leq \tau/4 + \tau/2 + |\mathcal{E}_T [q_i] - \mathbb{E} [q_i]|.$$

By Lemma 5, with probability  $1 - \frac{\beta}{2}$  the final term is at most  $\tau/4$  simultaneously for all  $i < \eta$ .  $\square$

**Lemma 2.** For any  $\tau, \beta$ , and  $n$ , any sequence of querying rules, and any non-adaptive user  $\{u_j\}_{j \in [M]}$  interacting with  $\text{VALIDATIONROUND}(\tau, \beta, n, S, T)$ ,  $\mathbb{P} \left[ \eta \leq I(\tau, \beta, n) \wedge \eta \in \{u_j\}_{j \in [M]} \right] \leq \beta$ .

*Proof.* Since the non-adaptive user's querying rules ignore all of the history, they are each chosen independently of  $S$ . By Hoeffding's inequality

$$\mathbb{P} \left[ \left| \mathcal{E}_S [Q_{u_j}] - \mathbb{E}_{x \sim \mathcal{D}} [Q_{u_j}(x)] \right| > \frac{\tau}{4} \right] \leq 2 \exp \left( -\frac{n\tau^2}{8} \right)$$

and similarly for  $T$ . If both  $\eta \leq I(\tau, \beta, n)$  and  $\eta = u_j$ , then the algorithm halted upon receiving query  $q_{u_j}$  because its empirical means on  $S$  and  $T$  were too dissimilar and *not* because it had already answered its maximum allotment of queries. Therefore,

$$\mathbb{P} [\eta \leq I(\tau, \beta, n) \wedge \eta = u_j] = \mathbb{P} \left[ \left| \mathcal{E}_S [Q_{u_j}] - \mathcal{E}_T [Q_{u_j}] \right| > \frac{\tau}{2} \right] \leq 4 \exp \left( -\frac{n\tau^2}{8} \right).$$

At most  $I(\tau, \beta, n) = \frac{\beta}{4} \exp \left( \frac{n\tau^2}{8} \right)$  queries are answered by the mechanism, so a union bound completes the proof.  $\square$

**Lemma 6.** For any  $\tau, \beta, n$ , any sequence of query rules, and any possibly adaptive autonomous user  $\{u_j\}_{j \in [M]}$ , if  $\sigma^2 = \frac{\tau^2}{32 \ln(8n^2/\beta)}$  and  $M \leq \frac{n^2 \tau^4}{175760 \ln^2(8n^2/\beta)}$  then

$$\mathbb{P} \left[ \forall j \in [M] \left| \mathcal{E}_S [Q_{u_j}] - \mathbb{E}_{x \sim \mathcal{D}} [Q_{u_j}(x)] \right| \leq \frac{\tau}{4} \right] \geq 1 - \frac{\beta}{2}.$$

*Proof.* Consider a slightly modified version of VALIDATIONROUND, where Gaussian noise  $z_i \sim \mathcal{N}(0, \sigma^2)$  is added instead of truncated Gaussian noise  $\xi_i$ . Until this modified algorithm halts, all of the answers it provides are released according to the Gaussian mechanism on  $S$ , which satisfies  $\frac{1}{2n^2\sigma^2}$ -zCDP by Proposition 1.6 in [6]. We can view  $Q_{u_j} = R_{u_j}((q_{u_1}, a_{u_1}, p_{u_1}), \dots, (q_{u_{j-1}}, a_{u_{j-1}}, p_{u_{j-1}}))$  as an (at most)  $M$ -fold composition of  $\frac{1}{2n^2\sigma^2}$ -zCDP mechanisms, which satisfies  $\frac{M}{2n^2\sigma^2}$ -zCDP by Lemma 1.7 in [6]. Finally, Proposition 1.3 in [6] shows us how to convert this concentrated differential privacy guarantee to a regular differential privacy guarantee. In particular,  $q_{u_j}$  is generated under

$$\left( \frac{M}{2n^2\sigma^2} + 2\sqrt{\frac{M}{2n^2\sigma^2} \ln(1/\delta)}, \delta \right)\text{-DP} \quad \forall \delta > 0.$$

Specifically, when  $\sigma^2, \delta$  and  $M$  satisfy:

$$\begin{aligned} \sigma^2 &= \frac{\tau^2}{32 \ln(8n^2/\beta)} \\ \delta &= \frac{\beta}{8n^2} = \frac{\beta}{\frac{n^2\tau}{13 \ln(104/\tau)}} \cdot \frac{\tau}{104 \ln(104/\tau)} \\ M &\leq \frac{n^2 \tau^4}{175760 \ln^2(8n^2/\beta)}. \end{aligned}$$

then  $q_{u_j}$  is generated by a  $(\frac{\tau}{52}, \delta)$ -differentially private mechanism. Therefore, by Theorem 8 in [11] (cf. [4, 18])

$$\mathbb{P} \left[ \left| \mathcal{E}_S [q_{u_j}] - \mathbb{E} [q_{u_j}] \right| > \frac{\tau}{4} \right] \leq \frac{\beta}{\frac{n^2\tau}{13 \ln(104/\tau)}} \ll \frac{\beta}{4M}.$$

Furthermore, for  $z_i \sim \mathcal{N}(0, \sigma^2)$   $\mathbb{P}[|z_i| \geq \tau/4] \leq \beta/(4n^2) \leq \beta/(4M)$ . Therefore, the total variation distance between  $\xi_{u_j} \sim \mathcal{N}(0, \sigma^2, [-\tau/4, \tau/4])$  and  $z_{u_j} \sim \mathcal{N}(0, \sigma^2)$  is  $\Delta(\xi_{u_j}, z_{u_j}) = \mathbb{P}[z_{u_j} \notin [-\tau/4, \tau/4]] \leq \frac{\beta}{4M}$ . Consider two random vectors  $Z$  and  $\xi$ , the first of which has independent  $\mathcal{N}(0, \sigma^2)$  distributed coordinates, and the second of which has coordinates  $\xi_{u_j} \sim \mathcal{N}(0, \sigma^2, [-\tau/4, \tau/4])$  for  $j \in [M]$  and  $\xi_i = Z_i$  for all of the  $i \notin \{u_j\}$ . The total variation distance between these vectors is then at most  $\Delta(\xi, Z) \leq M\Delta(\xi_{u_j}, z_{u_j}) \leq \frac{\beta}{4}$ .

Now, for the given sequence of querying rules,  $S$ , and  $T$ , view VALIDATIONROUND as a function of the random noise which is added into the answers. Then  $\Delta(\text{VALIDATIONROUND}(\xi), \text{VALIDATIONROUND}(Z)) \leq \Delta(\xi, Z) \leq \frac{\beta}{4}$  too. Above, we showed that with probability  $1 - \beta/4$  the user's interaction with VALIDATIONROUND( $Z$ ) has the property that

$$\mathbb{P} \left[ \exists j \in [M] \left| \mathcal{E}_S [q_{u_j}] - \mathbb{E} [q_{u_j}] \right| > \frac{\tau}{4} \right] \leq \frac{\beta}{4}.$$

So their interaction with VALIDATIONROUND( $\xi$ ) satisfies

$$\mathbb{P} \left[ \exists j \in [M] \left| \mathcal{E}_S [q_{u_j}] - \mathbb{E} [q_{u_j}] \right| > \frac{\tau}{4} \right] \leq \frac{\beta}{2}.$$

Since this statement only depends on the indices of  $\xi$  in  $\{u_j\}_{j \in [M]}$ , we can replace all of the remaining indices with truncated Gaussians and maintain this property, which recovers VALIDATIONROUND.  $\square$

**Lemma 3.** For any  $\tau, \beta$ , and  $n$ , any sequence of querying rules, and any autonomous user  $\{u_j\}_{j \in [M]}$  interacting with VALIDATIONROUND( $\tau, \beta, n, S, T$ ), if  $\sigma^2 = \frac{\tau^2}{32 \ln(8n^2/\beta)}$  and  $M \leq \frac{n^2 \tau^4}{175760 \ln^2(8n^2/\beta)}$  then  $\mathbb{P} \left[ \eta \leq I(\tau, \beta, n) \wedge \eta \in \{u_j\}_{j \in [M]} \right] \leq \beta$ .

*Proof of Lemma 3.* Consider a query  $q_{u_j}$  made by the autonomous user. Lemma 5 guarantees that

$$\mathbb{P} \left[ \forall j \in [M] \quad |\mathcal{E}_T[q_{u_j}] - \mathbb{E}[q_{u_j}]| \leq \frac{\tau}{4} \right] \geq 1 - \frac{\beta}{2}.$$

By Lemma 6, with the hypothesized  $\sigma^2$  and  $M$

$$\mathbb{P} \left[ \forall j \in [M] \quad |\mathcal{E}_S[q_{u_j}] - \mathbb{E}[q_{u_j}]| \leq \frac{\tau}{4} \right] \geq 1 - \frac{\beta}{2}.$$

If both  $\eta \leq I(\tau, \beta, n)$  and  $\eta \in \{u_j\}_{j \in [M]}$ , then the algorithm halted upon receiving a query  $q_{u_j}$  because its empirical means on  $S$  and  $T$  were too dissimilar and *not* because it had already answered its maximum allotment of queries:

$$\begin{aligned} & \mathbb{P} \left[ \eta \leq I(\tau, \beta, n) \wedge \eta \in \{u_j\}_{j \in [M]} \right] \\ &= \mathbb{P} \left[ \exists j \in [M] \quad |\mathcal{E}_S[q_{u_j}] - \mathcal{E}_T[q_{u_j}]| > \frac{\tau}{2} \right] \leq \beta. \end{aligned} \quad \square$$

## B Proofs of Lemma 4

**Lemma 4.** *If  $N_0 \geq 18 \ln(2)/\tau^2$  and  $I(\tau, \beta_t, N_t) = (\beta_t/4) \exp(N_t \tau^2/8)$  queries are answered during round  $t$ , then at least  $6N_t$  revenue is collected.*

*Proof.* The revenue collected in round  $t$  via the low price  $\frac{96}{\tau^2 i}$  depends on how many queries are answered both in and before round  $t$ . The maximum number of queries answered in a round is  $I_t = I(\tau, \beta_t, N_t) = (\beta_t/4) \exp(N_t \tau^2/8)$  (this is enforced by VALIDATIONROUND). Let  $B_T$  be the total number of queries made before the beginning of round  $T$ , then

$$\begin{aligned} B_T &\leq \sum_{t=0}^{T-1} I_t = \sum_{t=0}^{T-1} \frac{\beta_t}{4} \exp\left(\frac{N_t \tau^2}{8}\right) \\ &\leq \frac{\beta_0}{4} \exp\left(\sum_{t=0}^{T-1} \frac{\tau^2}{8} 3^t N_0 - t \ln 2\right) \\ &\leq (\beta_T/4) \exp(N_T \tau^2/16). \end{aligned}$$

The first inequality holds because every exponent in the sum is at least  $\ln(2)$  by our choice of  $N_0$  and for any  $x, y \geq \ln 2$ ,  $e^{x+y} \geq 2 \max(e^x, e^y) \geq e^x + e^y$ . The second inequality holds since  $N_0 > \frac{18 \ln 2}{\tau^2}$  implies  $-T^2 + 3T - N_0 \tau^2/(8 \ln 2) \leq 0$ . So, if  $I_T$  queries are answered during round  $T$ , the revenue collected is at least

$$\begin{aligned} \sum_{i=1}^{I_T} \frac{96}{\tau^2 (B_T + i)} &\geq \frac{96}{\tau^2} (\ln(B_T + I_T) - \ln(B_T)) \\ &\geq \frac{96}{\tau^2} \ln \left( 1 + \frac{(\beta_T/4) \exp(N_T \tau^2/8)}{(\beta_T/4) \exp(N_T \tau^2/16)} \right) \\ &\geq 6N_T \end{aligned} \quad \square$$

## C Tighter THRESHOLDOUT Analysis

In this section, we provide a tighter analysis of the THRESHOLDOUT algorithm [11]. In particular, previous analysis showed a sample complexity for answering  $m$  queries with an overfitting budget of  $B$  of  $\tilde{O}(\sqrt{B} \ln^{1.5} m)$  whereas we prove a bound like  $\tilde{O}(\sqrt{B} \ln m)$ . The improvement has important consequences for our application of THRESHOLDOUT to the everlasting database setting. We make the improvement by applying the “monitor technique” of Bassily et al. [4].

**Lemma 7** (Lemma 23 [11]). *THRESHOLDOUT satisfies  $(\frac{2B}{\sigma n}, 0)$ -differential privacy and also  $(\frac{\sqrt{32B \ln(2/\delta)}}{\sigma n}, \delta)$ -differential privacy for any  $\delta > 0$ .*

---

**Algorithm 4** THRESHOLDOUT( $S, T, \tau, \beta, \zeta, B, \sigma$ )

---

```
1: Sample  $\rho \sim \text{Laplace}(2\sigma)$ 
2: for each query  $q$  do
3:   if  $B < 1$  then
4:     HALT
5:   else
6:     Sample  $\lambda \sim \text{Laplace}(4\sigma)$ 
7:     if  $|\mathcal{E}_S[q] - \mathcal{E}_T[q]| > \zeta + \rho + \lambda$  then
8:       Sample  $\xi \sim \text{Laplace}(\sigma)$ ,  $\rho \sim \text{Laplace}(2\sigma)$ 
9:        $B \leftarrow B - 1$ 
10:      Output:  $(\mathcal{E}_T[q] + \xi, \top)$ 
11:    else
12:      Output:  $(\mathcal{E}_S[q], \perp)$ 
```

---

**Lemma 8** (Corollary 7 [11]). *Let  $\mathcal{A}$  be an algorithm that outputs a statistical query  $q$ . Let  $S$  be a random dataset chosen according to distribution  $\mathcal{D}^n$  and let  $q = \mathcal{A}(S)$ . If  $\mathcal{A}$  is  $\epsilon$ -differentially private then*

$$\mathbb{P}[|\mathcal{E}_S[q] - \mathbb{E}[q]| \geq \epsilon] \leq 6 \exp(-n\epsilon^2)$$

**Lemma 9** (Theorem 8 [11]). *Let  $\mathcal{A}$  be an  $(\epsilon, \delta)$ -differentially private algorithm that outputs a statistical query. For dataset  $S$  drawn from  $\mathcal{D}^n$ , we let  $q = \mathcal{A}(S)$ . Then for  $n \geq \frac{2 \ln(8/\delta)}{\epsilon^2}$ ,*

$$\mathbb{P}[|\mathcal{E}_S[q] - \mathbb{E}[q]| > 13\epsilon] \leq \frac{2\delta}{\epsilon} \ln\left(\frac{2}{\epsilon}\right)$$

**Theorem 5** (cf. Theorem 25 [11]). *Let  $\beta, \tau > 0$  and  $m \geq B > 0$ . Set  $\zeta = \frac{3\tau}{4}$  and  $\sigma = \frac{\tau}{48 \ln(4m/\beta)}$ . Let  $S, T$  denote datasets of size  $n$  drawn i.i.d. from a distribution  $\mathcal{D}$ . Consider an analyst that is given access to  $S$  and adaptively chooses functions  $q_1, \dots, q_m$  while interacting with THRESHOLDOUT which is given datasets  $S, T$  and values  $\sigma, B, \zeta$ . For every  $i \in [m]$  let  $(a_i, o_i)$  denote the answer of THRESHOLDOUT on query  $q_i$ . Then whenever*

$$n \geq \min \left\{ \mathcal{O}\left(\frac{B \ln\left(\frac{m}{\beta}\right)}{\tau^2}\right), \mathcal{O}\left(\frac{\ln\left(\frac{m}{\beta}\right) \sqrt{B \ln\left(\frac{\ln(1/\tau)}{\beta\tau}\right)}}{\tau^2}\right) \right\}$$

*with probability at least  $1 - \beta$ , for all  $i$  before THRESHOLDOUT halts  $|a_i - \mathbb{E}[q_i]| \leq \tau$  and  $o_i = \top \implies q_i$  is an adaptive query.*

*Proof.* Consider the following post-processing of the output of THRESHOLDOUT: look through the sequence of queries and answers  $(q_1, a_1), \dots, (q_{\text{HALT}}, a_{\text{HALT}})$  and output  $q^*, a^* = \arg \max_{q,a} |a - \mathbb{E}[q]|$ . Since this procedure does not use the datasets  $S, T$  and since THRESHOLDOUT computes the sequence of queries and answers in a differentially private manner, it means that  $q^*, a^*$  are also released under differential privacy. So by Lemma 7,  $q^*$  is released simultaneously under

$$\left(\frac{2B}{\sigma n}, 0\right)\text{-differential privacy} \quad \text{and} \quad \left(\frac{\sqrt{32B \ln(2/\delta)}}{\sigma n}, \delta\right)\text{-differential privacy} \quad (2)$$

With our choice of  $\sigma$ , in the case that  $n \geq \frac{768B \ln(\frac{4m}{\beta})}{\tau^2}$  then, using the pure differential privacy guarantee we have  $\frac{2B}{\sigma n} \leq \frac{\tau}{8}$  so by Lemma 8

$$\mathbb{P}[|\mathcal{E}_T[q^*] - \mathbb{E}[q^*]| > \frac{\tau}{8}] \leq \frac{\beta}{4} \quad (3)$$

Alternatively, in the case that

$$n \geq \max \left\{ \frac{9984 \ln\left(\frac{4m}{\beta}\right) \sqrt{32B \ln\left(\frac{1664 \ln\left(\frac{208}{\beta\tau}\right)}{\beta\tau}\right)}}{\tau^2}, \frac{21632 \ln\left(\frac{6656 \ln\left(\frac{208}{\beta\tau}\right)}{\beta\tau}\right)}{\tau^2} \right\}$$

then, choosing  $\delta = \frac{\beta\tau}{832 \ln(\frac{208}{\tau})}$ , under the approximate differential privacy guarantee we have

$$\left( \frac{\sqrt{32B \ln(2/\delta)}}{\sigma n}, \delta \right) \preceq \left( \frac{\tau}{104}, \frac{\beta\tau}{832 \ln(\frac{208}{\tau})} \right) \quad (4)$$

so by Lemma 9

$$\mathbb{P} \left[ |\mathcal{E}_T[q^*] - \mathbb{E}[q^*]| > \frac{\tau}{8} \right] \leq \frac{\beta}{4} \quad (5)$$

Therefore, in either case  $\mathbb{P} \left[ |\mathcal{E}_T[q^*] - \mathbb{E}[q^*]| > \frac{\tau}{8} \right] \leq \frac{\beta}{4}$ .

Next, we note that the random variable  $\lambda$  is sampled at most  $m$  times, and the random variables  $\rho$  and  $\xi$  are sampled at most  $B$  times. Consequently,

$$\mathbb{P} \left[ \exists i \mid \lambda_i > \frac{\tau}{12} \right] \leq m \cdot \mathbb{P} \left[ \left| \text{Laplace} \left( \frac{\tau}{12 \ln(4m/\beta)} \right) \right| > \frac{\tau}{12} \right] \leq \frac{\beta}{4} \quad (6)$$

$$\mathbb{P} \left[ \exists i \mid \rho_i > \frac{\tau}{24} \right] \leq B \cdot \mathbb{P} \left[ \left| \text{Laplace} \left( \frac{\tau}{24 \ln(4m/\beta)} \right) \right| > \frac{\tau}{24} \right] \leq \frac{\beta}{4} \quad (7)$$

$$\mathbb{P} \left[ \exists i \mid \xi_i > \frac{7\tau}{8} \right] \leq B \cdot \mathbb{P} \left[ \left| \text{Laplace} \left( \frac{\tau}{48 \ln(4m/\beta)} \right) \right| > \frac{7\tau}{8} \right] \leq \frac{\beta}{8} \quad (8)$$

For the rest of the proof, we condition on the events  $|\mathcal{E}_T[q^*] - \mathbb{E}[q^*]| \leq \frac{\tau}{8}$  and  $\forall i \mid |\lambda_i| < \frac{\tau}{12}$ ,  $|\rho_i| < \frac{\tau}{24}$ , and  $|\xi_i| < \frac{7\tau}{8}$ . This event happens with probability  $1 - \frac{7\beta}{8}$ .

Consider two alternatives: either  $a^* = \mathcal{E}_T[q^*] + \xi^*$  or  $a^* = \mathcal{E}_S[q^*]$ . In the first case,

$$|a^* - \mathbb{E}[q^*]| \leq |a^* - \mathcal{E}_T[q^*]| + |\xi^*| \leq \frac{\tau}{8} + \frac{7\tau}{8} = \tau \quad (9)$$

In the second case, we also have that  $|\mathcal{E}_S[q^*] - \mathcal{E}_T[q^*]| < \zeta + \rho^* + \lambda^*$ , so

$$|a^* - \mathbb{E}[q^*]| \leq |\mathcal{E}_S[q^*] - \mathcal{E}_T[q^*]| + |\mathcal{E}_T[q^*] - \mathbb{E}[q^*]| \leq \zeta + |\rho^*| + |\lambda^*| + \frac{\tau}{8} \leq \frac{3\tau}{4} + \frac{\tau}{24} + \frac{\tau}{12} + \frac{\tau}{8} = \tau \quad (10)$$

Therefore, for all queries before THRESHOLDOUT halts,  $|a_i - \mathbb{E}[q_i]| \leq \tau$ .

Next, observe that if  $q$  is a non-adaptive query, then

$$\mathbb{P} \left[ |\mathcal{E}_S[q] - \mathbb{E}[q]| > \frac{\tau}{4} \right] = \mathbb{P} \left[ |\mathcal{E}_T[q] - \mathbb{E}[q]| > \frac{\tau}{4} \right] \leq 2 \exp \left( -\frac{\tau^2 n}{8} \right) \leq 2 \exp \left( 50 \ln \left( \frac{\beta}{4m} \right) \right) \leq \frac{2\beta}{m \cdot 4^{50}} \quad (11)$$

Therefore, with probability at least  $1 - \frac{\beta}{8}$ , for all non-adaptive queries  $|\mathcal{E}_S[q] - \mathcal{E}_T[q]| \leq \frac{\tau}{2}$ . Furthermore,

$$\zeta + \rho + \lambda \geq \frac{3\tau}{4} - \frac{\tau}{24} - \frac{\tau}{12} = \frac{5\tau}{8} \quad (12)$$

Thus, for all non-adaptive queries  $|\mathcal{E}_S[q_i] - \mathcal{E}_T[q_i]| \leq \zeta + \rho_i + \lambda_i$ , so  $o_i = \perp$ .  $\square$

## D Guarantees of EVERLASTINGTO

**Theorem 6.** [Validity] For any  $\tau, \beta, p \in (0, 1)$  and for a sufficiently large initial budget and for any sequence of queries, EVERLASTINGTO returns answers such that

$$\mathbb{P} \left[ \exists i \mid |a_i - \mathbb{E}[q_i]| > \tau \right] < \beta$$

*Proof.* In round  $t$ , the algorithm uses an instance of THRESHOLDOUT with  $N_t$  samples for the datasets  $S_t$  and  $T_t$ , so to answer  $M_t$  total queries of which at most  $B_t$  overfit we need both

$$N_t = ne^t \geq \frac{21632 \ln \left( \frac{6656 \ln(\frac{208}{\tau})}{\tau \beta_t} \right)}{\tau^2} \quad (13)$$

$$N_t = ne^t \geq \frac{9984 \ln \left( \frac{4M_t}{\beta_t} \right) \sqrt{32B_t \ln \left( \frac{1664 \ln(\frac{208}{\tau})}{\tau \beta_t} \right)}}{\tau^2} \quad (14)$$

---

**Algorithm 5** EVERLASTINGTO( $\tau, \beta, p$ )

---

```
1: Require sufficiently large initial budget  $n$  (see proof of Theorem 6)
2:  $\forall t$  set  $N_t = ne^t$ ,  $\beta_t = \frac{(e-1)\beta}{e}e^{-t}$ ,  $B_t = \frac{\tau^4 N_t^{2-2p}}{8 \cdot 9984^2 \ln\left(\frac{1664 \ln\left(\frac{208}{\tau}\right)}{\tau \beta_t}\right)}$ ,  $M_t = \frac{\beta_t}{4} \exp(2N_t^p)$ 
3: for  $t = 0, 1, \dots$  do
4:   Purchase datasets  $S_t, T_t \sim \mathcal{D}^{N_t}$  and initialize THRESHOLDOUT( $S_t, T_t, B_t, \beta_t$ )
5:   while THRESHOLDOUT( $S_t, T_t, B_t, \beta_t$ ) has not halted do
6:     Accept query  $q$ 
7:      $(a, o) = \text{THRESHOLDOUT}(S_t, T_t, B_t, \beta_t)(q)$ 
8:     Output:  $a$ 
9:     if  $o = \perp$  then
10:      Charge:  $\frac{2N_{t+1}}{M_t}$ 
11:     else
12:      Charge:  $\frac{2N_{t+1}}{B_t}$ 
```

---

in order to satisfy the hypotheses of Theorem 5. Setting the constant  $n$  such that

$$n \geq \frac{21632 \left(1 + \ln\left(\frac{6656e \ln\left(\frac{208}{\tau}\right)}{(e-1)\tau\beta}\right)\right)}{\tau^2} \quad (15)$$

ensures that (13) holds. Furthermore, with our choice of

$$B_t = \frac{\tau^4 N_t^{2-2p}}{8 \cdot 9984^2 \ln\left(\frac{1664 \ln\left(\frac{208}{\tau}\right)}{\tau \beta_t}\right)} \quad (16)$$

the condition (14) allows us to answer  $M_t = \frac{\beta_t}{4} \exp(2N_t^p)$  total queries.

We also need to ensure that  $1 \leq B_t \leq M_t \forall t$  in order to ensure that THRESHOLDOUT has sound parameters. To satisfy  $1 \leq B_t$  requires the initial budget  $n$  to be sufficiently large as  $p \rightarrow 1$ .

$$1 \leq \frac{\tau^4 (ne^t)^{2-2p}}{8 \cdot 9984^2 \ln\left(\frac{1664 \ln\left(\frac{208}{\tau}\right)}{\tau \beta_t}\right)} \forall t \iff n \geq \sup_{t \in \mathbb{N}} e^{-t} \left( \frac{8 \cdot 9984^2 \left(t + \ln\left(\frac{1664e \ln\left(\frac{208}{\tau}\right)}{(e-1)\tau\beta}\right)\right)}{\tau^4} \right)^{\frac{1}{2-2p}} \quad (17)$$

By Lemma 10, it thus suffices to choose

$$n \geq \left( \frac{8 \cdot 9984^2 \ln\left(\frac{1664e \ln\left(\frac{208}{\tau}\right)}{(e-1)\tau\beta}\right)}{\tau^4} + \frac{4 \cdot 9984^2}{(1-p)\tau^4} \right)^{\frac{1}{2-2p}} \quad (18)$$

At the same time, we need the initial budget to be large enough that  $\forall t B_t \leq M_t$ :

$$M_t \geq B_t \quad \forall t \quad (19)$$

$$\iff \frac{(e-1)\beta}{4e} \exp(2n^p e^{pt} - t) \geq \frac{\tau^4 (ne^t)^{2-2p}}{8 \cdot 9984^2 \ln\left(\frac{1664e \ln\left(\frac{208}{\tau}\right)}{(e-1)\tau\beta}\right)} \quad \forall t \quad (20)$$

$$\iff \inf_{t \in \mathbb{N}} 2n^p e^{pt} - (3-2p)t - (2-2p) \ln n \geq \ln \left( \frac{e\tau^4}{2 \cdot 9984^2 (e-1)\beta \ln\left(\frac{1664e \ln\left(\frac{208}{\tau}\right)}{(e-1)\tau\beta}\right)} \right) \quad (21)$$

By Lemma 11, the infimum can be lower bounded by  $\ln n - \frac{3-2p}{p} \ln \frac{3-2p}{2ep}$  when  $n \geq \left(\frac{3-2p}{2p}\right)^{1/p}$ . Therefore,  $\forall t \ B_t \leq M_t$  is implied by

$$n \geq \max \left\{ \frac{e\tau^4 \left(\frac{3-2p}{2ep}\right)^{\frac{3-2p}{p}}}{2 \cdot 9984^2 (e-1)\beta \ln \left(\frac{1664e \ln \left(\frac{208}{\tau}\right)}{(e-1)\tau\beta}\right)}, \left(\frac{3-2p}{2p}\right)^{1/p} \right\} \iff n \geq \left(\frac{3-2p}{2p}\right)^{\frac{3-2p}{p}} \quad (22)$$

Therefore, in order to satisfy the hypotheses of Theorem 5, we require from (15), (18), and (22) that

$$n \geq \max \left\{ \frac{21632 \ln \left(\frac{6656e^2 \ln \left(\frac{208}{\tau}\right)}{(e-1)\tau\beta}\right)}{\tau^2}, \left( \frac{8 \cdot 9984^2 \ln \left(\frac{1664e \ln \left(\frac{208}{\tau}\right)}{(e-1)\tau\beta}\right)}{\tau^4} + \frac{4 \cdot 9984^2}{(1-p)\tau^4} \right)^{\frac{1}{2-2p}}, \left(\frac{3-2p}{2p}\right)^{\frac{3-2p}{p}} \right\} \quad (23)$$

Generally speaking, the first term will dominate when  $p$  is relatively far from both zero and one, the second term will dominate as  $p \rightarrow 1$ , and the third term will dominate when  $p \rightarrow 0$ .

By Theorem 5, in round  $t$ , all answers returned by THRESHOLDOUT satisfy  $|a_i - \mathbb{E}[q_i]| \leq \tau$  with probability  $1 - \beta_t$ . Therefore,

$$\mathbb{P}[\exists i \ |a_i - \mathbb{E}[q_i]| > \tau] \leq \sum_{t=0}^{\infty} \beta_t = \frac{(e-1)\beta}{e} \sum_{t=0}^{\infty} e^{-t} = \beta \quad (24)$$

□

**Theorem 7. [Sustainability]** For any  $\tau, \beta, p \in (0, 1)$  and any sequence of queries, EVERLASTINGTO charges enough for queries such that it can always afford to buy new datasets, excluding the initial budget.

*Proof.* The  $t^{\text{th}}$  instance of THRESHOLDOUT halts only after it has either answered  $M_t$  total queries or at least  $B_t$  queries with  $o = \top$ . In the first case, the total revenue is at least  $M_t \cdot \frac{2N_{t+1}}{M_t} = 2N_{t+1}$  and in the latter case, the total revenue is at least  $B_t \cdot \frac{2N_{t+1}}{B_t} = 2N_{t+1}$ . Either way, it can afford to buy  $S_{t+1}, T_{t+1}$ , which have size  $N_{t+1}$  each. □

**Theorem 8. [Non-Adaptive Cost]** For any  $\tau, \beta, p \in (0, 1)$ , a sufficiently large initial budget, and any sequence of querying rules, the total cost,  $\Pi$ , to a non-adaptive user who makes  $M$  queries to EVERLASTINGTO satisfies

$$\mathbb{P} \left[ \Pi > 2e^3 \ln^{1/p} \left( \frac{eM}{(e-1)\beta} \right) \right] \leq \beta$$

*Proof.* By Theorem 5's guarantee on THRESHOLDOUT and a union bound over all  $t$ , all non-adaptive queries are answered with  $o = \perp$  with probability at least  $1 - \sum_{t=0}^{\infty} \beta_t = 1 - \beta$ . For the rest of the proof, we condition on this event.

First, observe that the cost of a query with  $o = \perp$  is non-increasing over time, so the cost of any  $M$  non-adaptive queries is no more than the cost of making the *first*  $M$  non-adaptive queries. Let  $T$  be the round in which the  $M^{\text{th}}$  non-adaptive query is made if no adaptive queries are made.

Let  $\Pi$  be the total amount paid. This is at most the total number of samples used in rounds 1 through  $T + 1$ , i.e.

$$\Pi \leq \sum_{t=1}^{T+1} 2N_t = 2n \sum_{t=1}^{T+1} e^t \leq 2ne^{T+2} \quad (25)$$

Furthermore, the total number of queries made satisfies

$$M \geq M_{T-1} = \beta_{T-1} \exp(2N_{T-1}^p) \quad (26)$$

which implies

$$\ln \left( \frac{eM}{(e-1)\beta} \right) \geq 2N_{T-1}^p - (T-1) \geq N_{T-1}^p = n^p e^{p(T-1)} \quad (27)$$

where we use the fact that  $n \geq (1/p)^{1/p}$  (see proof of Theorem 6) which implies  $N_{T-1}^p = n^p e^{p(T-1)} \geq \frac{e^{p(T-1)}}{p} \geq \frac{p(T-1)}{p} = T-1$ . Combining (25) and (27),

$$\Pi \leq 2ne^{T+2} \leq 2e^3 \ln^{1/p} \left( \frac{eM}{(e-1)\beta} \right) \quad (28) \quad \square$$

**Theorem 9.** [Adaptive Cost] For any  $\tau, \beta \in (0, 1)$ ,  $p \in (0, \frac{2}{3})$ , a sufficiently large initial budget, and any sequence of querying rules, the total cost,  $\Pi$ , to a user who makes  $B$  potentially adaptive queries to EVERLASTINGTO satisfies

$$\mathbb{P} \left[ \Pi \leq 2e^2 \left( \frac{8 \cdot 9984^2 e B \ln \left( \frac{1664 \ln \left( \frac{208}{\tau} \right)}{(e-1)\tau\beta} \right)}{\tau^4} \right)^{\frac{1}{2-3p}} \right] = 1$$

*Proof.* First, observe that the cost of a query is non-increasing over time, so the cost of any  $B$  adaptive queries is no more than the cost of making the *first*  $B$  adaptive queries. Furthermore, adaptive queries may be answered with either  $\top$  or  $\perp$ , but since  $B_t \leq M_t \forall t$ , the cost of an adaptive query in round  $t$  is no more than  $\frac{2N_{t+1}}{B_t}$ . Let  $T$  be the round in which the  $B^{\text{th}}$  adaptive query is made. Let  $\Pi$  be the total amount paid. This is at most the total number of samples used in rounds 1 through  $T+1$ , i.e.

$$\Pi \leq \sum_{t=1}^{T+1} 2N_t = 2n \sum_{t=1}^{T+1} e^t \leq 2ne^{T+2} \quad (29)$$

Furthermore, the total number of adaptive queries is

$$B \geq \sum_{t=0}^{T-1} B_t = \sum_{t=0}^{T-1} \frac{\tau^4 N_t^{2-2p}}{8 \cdot 9984^2 \ln \left( \frac{1664 \ln \left( \frac{208}{\tau} \right)}{\tau\beta_t} \right)} \quad (30)$$

$$\geq \frac{\tau^4}{8 \cdot 9984^2 \left( T-1 + \ln \left( \frac{1664 e \ln \left( \frac{208}{\tau} \right)}{(e-1)\tau\beta} \right) \right)} \sum_{t=0}^{T-1} N_t^{2-2p} \quad (31)$$

$$= \frac{\tau^4 n^{2-2p}}{8 \cdot 9984^2 \left( T + \ln \left( \frac{1664 \ln \left( \frac{208}{\tau} \right)}{(e-1)\tau\beta} \right) \right)} \sum_{t=0}^{T-1} e^{t(2-2p)} \quad (32)$$

$$\geq \frac{\tau^4 n^{2-2p} (e^{T(2-2p)} - 1)}{8 \cdot 9984^2 T \ln \left( \frac{1664 \ln \left( \frac{208}{\tau} \right)}{(e-1)\tau\beta} \right)} \quad (33)$$

$$\geq \frac{\tau^4 n^{2-2p} e^{T(2-2p)-1}}{8 \cdot 9984^2 T \ln \left( \frac{1664 \ln \left( \frac{208}{\tau} \right)}{(e-1)\tau\beta} \right)} \quad (34)$$

Where in the last inequality we used that  $p < \frac{2}{3}$  so  $e^{T(2-2p)} - 1 \geq e^{T(2-2p)-1}$ . Since  $n \geq (1/p)^{1/p}$  (see proof of Theorem 6), it is also the case that  $n^p e^{pT} \geq T$ . Picking up from (34), we have

$$\frac{8 \cdot 9984^2 B \ln \left( \frac{1664 \ln \left( \frac{208}{\tau} \right)}{(e-1)\tau\beta} \right)}{\tau^4} \geq \frac{n^{2-2p} e^{T(2-2p)-1}}{n^p e^{pT}} = n^{2-3p} e^{T(2-3p)-1} \quad (35)$$



thus

$$ne^T \leq \left( \frac{8 \cdot 9984^2 e B \ln \left( \frac{1664 \ln \left( \frac{208}{\tau} \right)}{(e-1)\tau\beta} \right)}{\tau^4} \right)^{\frac{1}{2-3p}} \quad (36)$$

Combining (29) and (36), we get that

$$\Pi \leq 2ne^{T+2} \leq 2e^2 \left( \frac{8 \cdot 9984^2 e B \ln \left( \frac{1664 \ln \left( \frac{208}{\tau} \right)}{(e-1)\tau\beta} \right)}{\tau^4} \right)^{\frac{1}{2-3p}} \quad (37) \quad \square$$

To expand on the guarantees of Theorems 8 and 9,  $p$  is a parameter of the algorithm that can be chosen roughly in the range  $(0, 1)$ . These theorems could be stated instead in terms of the quantity  $a = 1/p$ , which lies generally in the range  $(1, \infty)$ . In this case, a sequence of  $M$  non-adaptive queries would cost (with high probability) at most  $\mathcal{O}(\ln^a M)$ , and a sequence of  $M$  adaptive queries would cost at most  $\mathcal{O}(B^{\frac{a}{2a-3}})$ . That is, when  $a$  is near 1, we approach the optimal  $\log M$  cost for non-adaptive queries at the expense of a very large (exploding) cost of adaptive queries. On the other hand, as we made  $a$  very large, we approach the optimal  $\sqrt{M}$  cost for adaptive queries at the expense of more expensive polylog cost for non-adaptive queries. In this way, the parameter  $p$  trades off between placing the burden of adaptivity directly on the adaptive queries themselves and spreading it out over potentially non-adaptive queries too.

**Lemma 10.** For any  $\beta, \tau, p \in (0, 1)$ ,

$$\sup_{t \in \mathbb{N}} e^{-t} \left( \frac{8 \cdot 9984^2 \left( t + \ln \left( \frac{1664 e \ln \left( \frac{208}{\tau} \right)}{(e-1)\tau\beta} \right) \right)}{\tau^4} \right)^{\frac{1}{2-2p}} \leq \left( \frac{8 \cdot 9984^2}{\tau^4} \left( \ln \left( \frac{1664 e \ln \left( \frac{208}{\tau} \right)}{(e-1)\tau\beta} \right) + \frac{1}{2-2p} \right) \right)^{\frac{1}{2-2p}}$$

*Proof.* For brevity, let  $a := \frac{8 \cdot 9984^2}{\tau^4}$ , let  $b := \ln \left( \frac{1664 e \ln \left( \frac{208}{\tau} \right)}{(e-1)\tau\beta} \right)$ , and let  $c = \frac{1}{2-2p}$ , note that  $a, b, c > 0$ . We are thus interested in upper bounding  $\sup_{t \in \mathbb{N}} e^{-t} (at + ab)^c$ . First,

$$\frac{d}{dt} e^{-t} (at + ab)^c = ace^{-t} (at + ab)^{c-1} - e^{-t} (at + ab)^c \quad (38)$$

and

$$ace^{-t} (at + ab)^{c-1} - e^{-t} (at + ab)^c = 0 \iff t = c - b \text{ or } t = -b \text{ or } t \rightarrow \infty \quad (39)$$

Since we are only optimizing over  $t \in \mathbb{N}$  and  $b > 0$ , we do not need to consider the critical point  $t = -b$ . Furthermore,

$$\left. \frac{d^2}{dt^2} e^{-t} (at + ab)^c \right|_{t=c-b} = -\frac{1}{c} (ac)^c e^{b-c} < 0 \quad (40)$$

Therefore, the critical point at  $t = c - b$  is a local maximum. Therefore, the only points we need to consider are when  $t = 0$ ,  $t \rightarrow \infty$ , and  $t = c - b$  if  $c \geq b$ .

$$\sup_{t \in \mathbb{N}} e^{-t} (at + ab)^c \leq \begin{cases} (ab)^c & b > c \\ \max \{ (ab)^c, e^{b-c} (ac)^c \} & c \geq b \end{cases} \leq a^c (b + c)^c \quad (41)$$

which completes the proof.  $\square$

**Lemma 11.** For any  $p \in (0, 1)$  and  $n \geq 1$

$$\inf_{t \in \mathbb{N}} 2n^p e^{pt} - (3-2p)t - (2-2p) \ln n \geq \min \left\{ \ln n - \frac{3-2p}{p} \ln \frac{3-2p}{2ep}, 2n^p - (2-2p) \ln n \right\}$$

and the first term is the minimizer when  $n \geq \left( \frac{3-2p}{2p} \right)^{1/p}$

*Proof.* First, note that this is a convex function in  $t$  and

$$\frac{d}{dt} 2n^p e^{pt} - (3-2p)t - (2-2p) \ln n = 2pn^p e^{pt} - 3 + 2p \quad (42)$$

and

$$2pn^p e^{pt} - 3 + 2p = 0 \iff t = \frac{1}{p} \ln \frac{3-2p}{2p} - \ln n \quad (43)$$

Therefore, if  $\frac{1}{p} \ln \frac{3-2p}{2p} - \ln n \geq 0$  then

$$\inf_{t \in \mathbb{N}} 2n^p e^{pt} - (3-2p)t - (2-2p) \ln n \geq \ln n - \frac{3-2p}{p} \ln \frac{3-2p}{2ep} \quad (44)$$

Otherwise, if  $\frac{1}{p} \ln \frac{3-2p}{2p} - \ln n < 0$

$$\inf_{t \in \mathbb{N}} 2n^p e^{pt} - (3-2p)t - (2-2p) \ln n \geq 2n^p - (2-2p) \ln n \quad (45)$$

Thus,

$$\inf_{t \in \mathbb{N}} 2n^p e^{pt} - (3-2p)t - (2-2p) \ln n \geq \min \left\{ \ln n - \frac{3-2p}{p} \ln \frac{3-2p}{2ep}, 2n^p - (2-2p) \ln n \right\} \quad (46)$$

□

## E Relevant Results in Differential Privacy

Here, we state without proof definitions and results from other work which we use in the proof of Lemma 6.

**Definition 1.** A randomized algorithm  $\mathcal{M} : \mathcal{X}^* \mapsto \mathcal{Y}$  is  $(\epsilon, \delta)$ -differentially private if for all  $E \subseteq \mathcal{Y}$  and all datasets  $S, S' \in \mathcal{X}^*$  differing in a single element:

$$\mathbb{P}[\mathcal{M}(S) \in E] \leq e^\epsilon \mathbb{P}[\mathcal{M}(S') \in E] + \delta.$$

**Proposition 1** ([4, 18]). Let  $\mathcal{M}$  be an  $(\epsilon, \delta)$ -differentially private algorithm that outputs a function from  $\mathcal{X}$  to  $[0, 1]$ . For a random variable  $S \sim \mathcal{D}^n$  we let  $q = \mathcal{M}(S)$ . Then for  $n \geq 2 \ln(8/\delta)/\epsilon^2$ ,

$$\mathbb{P}[|\mathcal{E}_S[q] - \mathbb{E}[q]| \geq 13\epsilon] \leq \frac{2\delta}{\epsilon} \ln \left( \frac{2}{\epsilon} \right).$$

**Definition 2** (Definition 1.1 [6]). A randomized mechanism  $M : \mathcal{X}^n \rightarrow \mathcal{Y}$  is  $\rho$ -zero-concentrated differentially private (henceforth  $\rho$ -zCDP) if, for all  $S, S' \in \mathcal{X}^n$  differing on a single entry and all  $\alpha \in (1, \infty)$ ,

$$D_\alpha(\mathcal{M}(S) || \mathcal{M}(S')) \leq \rho\alpha,$$

where  $D_\alpha(\mathcal{M}(S) || \mathcal{M}(S'))$  is the  $\alpha$ -Rényi divergence between the distribution of  $\mathcal{M}(S)$  and  $\mathcal{M}(S')$ .

**Proposition 2** (Proposition 1.6 [6]). Let  $q$  be a statistical query. Consider the mechanism  $\mathcal{M} : \mathcal{X}^n \rightarrow \mathbb{R}$  that on input  $S$ , releases a sample from  $\mathcal{N}(\mathcal{E}_S[q], \sigma^2)$ . Then  $\mathcal{M}$  satisfies  $\frac{1}{2n^2\sigma^2}$ -zCDP.

**Proposition 3** (Lemma 1.7 [6]). Let  $\mathcal{M} : \mathcal{X}^n \rightarrow \mathcal{Y}$  and  $\mathcal{M}' : \mathcal{X}^n \rightarrow \mathcal{Z}$  be randomized algorithms. Suppose  $\mathcal{M}$  satisfies  $\rho$ -zCDP and  $\mathcal{M}'$  satisfies  $\rho'$ -zCDP. Define  $\mathcal{M}'' : \mathcal{X}^n \rightarrow \mathcal{Y} \times \mathcal{Z}$  by  $\mathcal{M}''(x) = (\mathcal{M}(x), \mathcal{M}'(x))$ . Then  $\mathcal{M}''$  satisfies  $(\rho + \rho')$ -zCDP.

**Proposition 4** (Proposition 1.3 [6]). If  $\mathcal{M}$  provides  $\rho$ -zCDP, then  $\mathcal{M}$  is  $(\rho + 2\sqrt{\rho \ln(1/\delta)}, \delta)$ -differentially private for any  $\delta > 0$ .
